# Supplementary material for: Behavioral Mechanisms That Depend on Dopamine and Serotonin in Caenorhabditis elegans Interact With the Antipsychotics Risperidone and Aripiprazole
Source: PubMed Central journal article supplement — J Exp Neurosci. 2018 Sep 18;12:1179069518798628. doi: 10.1177/1179069518798628 (PMC6144587; doi:10.1177/1179069518798628), 2018-09-18
Supplement: Supplementary_Tables.pdf [file Supplementary_Tables.pdf]

## Supplementary Tables

**Supplementary Table 1. Bonferroni post-hoc analysis after one-way ANOVA<sup>a</sup> of the pharyngeal pumping rate of the wild type N2 strain and each mutant strain.**

| Strain (I) | Strain (J)   | Mean Difference (I-J) | P <sup>b</sup> |
|------------|--------------|-----------------------|----------------|
| N2         | <i>ser-1</i> | 37.333                | 0.001 ***      |
|            | <i>ser-2</i> | 20.133                | 0.001 ***      |

<sup>a</sup>One-Way ANOVA (sum of squares = 51334.857; df = 21; F = 94.821; P = 0.001 \*\*\*)

<sup>b</sup>Statistical p-values: \*\*\*p < 0.001

**Supplementary Table 2. One-way ANOVA analysis of the pharyngeal pumping rate between each strain with and without risperidone or aripiprazole.**

| Strain                    | Sum of sq | df | F       | P <sup>a</sup> |
|---------------------------|-----------|----|---------|----------------|
| N2/N2 + Risp              | 64774.533 | 1  | 192.464 | 0.001 ***      |
| N2/N2 + Ari               | 37200.600 | 1  | 188.928 | 0.001 ***      |
| <i>ser-1/ser-1</i> + Risp | 5.400     | 1  | 0.029   | 0.865          |
| <i>ser-1/ser-1</i> + Ari  | 117.600   | 1  | 0.595   | 0.444          |
| <i>ser-2/ser-2</i> + Risp | 21432.600 | 1  | 93.519  | 0.001 ***      |
| <i>ser-2/ser-2</i> + Ari  | 264.600   | 1  | 1.089   | 0.301          |

<sup>a</sup>Statistical p-values: \*\*\*p < 0.001.

**Supplementary Table 3. Bonferroni post-hoc analysis after one-way ANOVA<sup>a</sup> of mechanosensory response of the wild type N2 strain from different generations after treatment with risperidone.**

| Strain (I) | Strain (J)      | Mean Difference (I-J) | P <sup>b</sup> |
|------------|-----------------|-----------------------|----------------|
| N2         | N2 + Risp       | 3.437                 | 0.001 ***      |
|            | n=1             | 1.645                 | 0.001 ***      |
|            | n=2             | 0.751                 | 0.001 ***      |
|            | n=3             | 0.315                 | 0.678          |
|            | Sodium butyrate | 0.055                 | 1.000          |
|            | Dauer           | 0.003                 | 1.000          |

<sup>a</sup>One-Way ANOVA (sum of squares = 483.483; df = 6; F = 119.659; P = 0.001 \*\*\*)

<sup>b</sup>Statistical p-values: \*\*\*p < 0.001.

**Supplementary Table 4. Bonferroni post-hoc analysis after one-way ANOVA<sup>a</sup> of mechanosensory response of the wild type N2 strain from different generations after treatment with aripiprazole.**

| <b>Strain (I)</b> | <b>Strain (J)</b> | <b>Mean Difference (I-J)</b> | <b>P<sup>b</sup></b> |
|-------------------|-------------------|------------------------------|----------------------|
| N2                | N2 + Ari          | 1.754                        | 0.001 ***            |
|                   | n=1               | 0.212                        | 0.506                |
|                   | Sodium butyrate   | -0.107                       | 1.000                |
|                   | Dauer             | -0.235                       | 1.000                |

<sup>a</sup>One-Way ANOVA (sum of squares = 167.765; df = 4; F = 79.890; P = 0.001 \*\*\*)

<sup>b</sup>Statistical p-values: \*\*\*p < 0.001.

**Supplementary Table 5. Bonferroni post-hoc analysis after one-way ANOVA<sup>a</sup> of the pharyngeal pumping rate of wild type N2 strain from different generations after treatment with risperidone.**

| <b>Strain (I)</b> | <b>Strain (J)</b> | <b>Mean Difference (I-J)</b> | <b>P<sup>b</sup></b> |
|-------------------|-------------------|------------------------------|----------------------|
| N2                | N2 + Risp         | 46.076                       | 0.001 ***            |
|                   | n=1               | -2.626                       | 1.000                |
|                   | Sodium butyrate   | -8.229                       | 0.129                |
|                   | Dauer             | -4.079                       | 1.000                |

<sup>a</sup>One-Way ANOVA (sum of squares = 114710.615; df = 4; F = 85.930; P = 0.001 \*\*\*)

<sup>b</sup>Statistical p-values: \*\*\*p < 0.001.

**Supplementary Table 6. Bonferroni post-hoc analysis after one-way ANOVA<sup>a</sup> of the pharyngeal pumping rate of wild type N2 strain from different generations after treatment with aripiprazole.**

| <b>Strain (I)</b> | <b>Strain (J)</b> | <b>Mean Difference (I-J)</b> | <b>P<sup>b</sup></b> |
|-------------------|-------------------|------------------------------|----------------------|
| N2                | N2 + Ari          | 49.600                       | 0.001 ***            |
|                   | n=1               | 27.400                       | 0.001 ***            |
|                   | n=2               | 0.400                        | 1.000                |
|                   | Sodium butyrate   | 3.600                        | 1.000                |
|                   | Dauer             | 4.400                        | 1.000                |

<sup>a</sup>One-Way ANOVA (sum of squares = 60836.200; df = 5; F = 72.279; P = 0.001 \*\*\*)

<sup>b</sup>Statistical p-values: \*\*\*p < 0.001.
